# Supplementary material for: Targeted attenuation of elevated histone marks at SNCA alleviates α‐synuclein in Parkinson's disease
Source: PubMed Central journal article supplement (PMC7863397; doi:10.15252/emmm.202012188), 2021-01-11
Supplement: EMMM-13-e12188-s003.pdf [file EMMM-13-e12188-s003.pdf]

Figure 2A

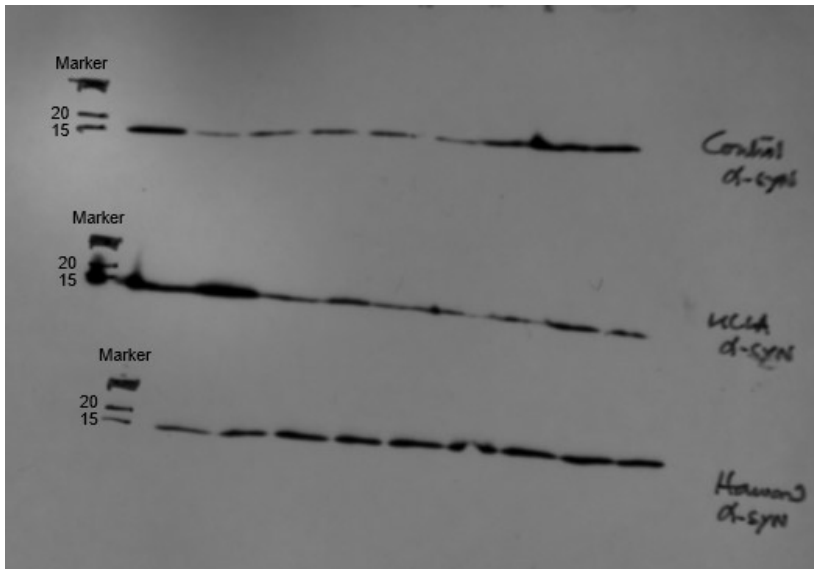

$\alpha$ -synuclein;  
Samples C1-C9

$\alpha$ -synuclein;  
Samples P1-P9

$\alpha$ -synuclein;  
Samples 1-9

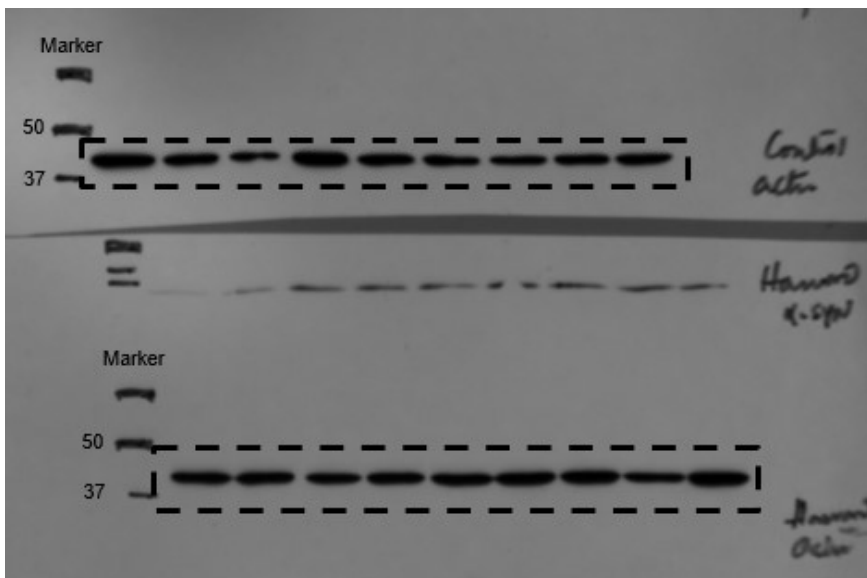

$\beta$ -actin  
Samples C1-C9

$\beta$ -actin  
Samples 1-9

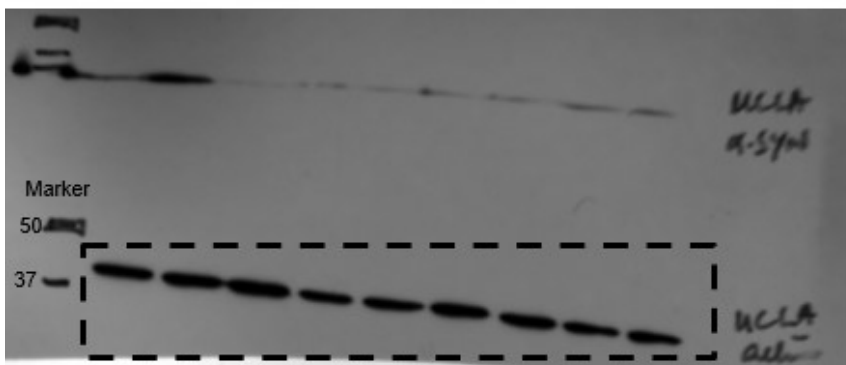

$\beta$ -actin;  
Samples P1-P9
