# Supplementary material for: Targeted attenuation of elevated histone marks at SNCA alleviates α‐synuclein in Parkinson's disease
Source: PubMed Central journal article supplement (PMC7863397; doi:10.15252/emmm.202012188), 2021-01-11

Figure 3C

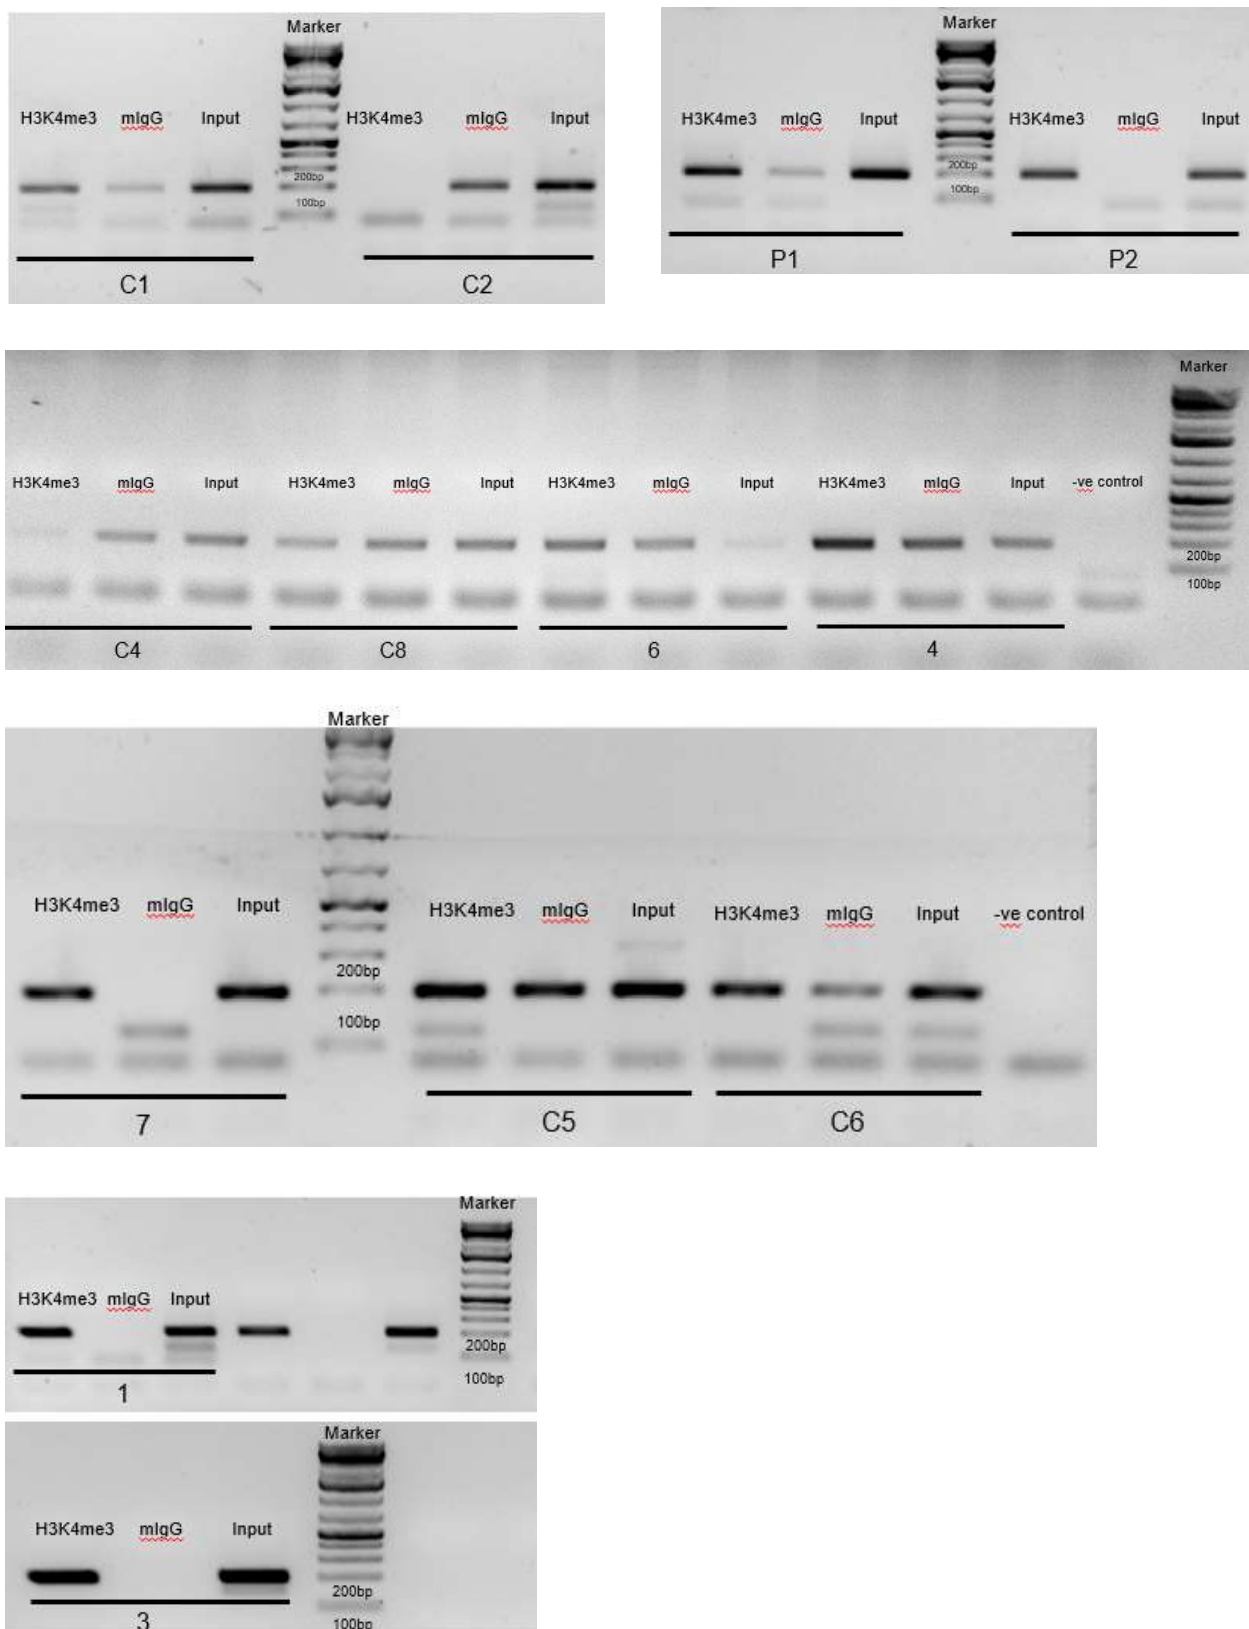

Supplement: EMMM-13-e12188-s004.pdf [file EMMM-13-e12188-s004.pdf]
